# Supplementary material
Source: PubMed Central journal article supplement (PMC6817363)
Supplement: EMS83526-supplement-1.pdf [file EMS83526-supplement-1.pdf]

# Supplementary information.

---

## Content.

|                                                                                                                                                               |          |
|---------------------------------------------------------------------------------------------------------------------------------------------------------------|----------|
| <b>Supplementary figures.....</b>                                                                                                                             | <b>2</b> |
| Supplementary Figure 1. Single bacteria analysis. ....                                                                                                        | 2        |
| Supplementary Figure 2. FNR is essential for <i>S. flexneri</i> gut colonization and is hyper sensitive to the inflammatory environment <i>in vivo</i> . .... | 3        |
| Supplementary Figure 3. Oxygen consumption rate for facultative and tolerant anaerobes. ....                                                                  | 4        |
| Supplementary Figure 4. Additional characterization of <i>S. flexneri</i> $\Delta$ <i>cydAB</i> and $\Delta$ <i>appBC</i> mutants.....                        | 5        |
| Supplementary Figure 5. GLUT-1 detection in guinea pig colonic mucosa infected by <i>S. flexneri</i> wild-type and mutant strains. ....                       | 6        |
| <b>Supplementary tables.....</b>                                                                                                                              | <b>7</b> |
| Supplementary Table 1. Data generated in this work. ....                                                                                                      | 7        |
| Supplementary Table 2. ANOVA test for hypoxia levels around dispersed or clustered bacteria.....                                                              | 8        |
| Supplementary Table 3. Student- <i>t</i> test comparing hypoxia levels around bacteria in conventional vs neutropenic animals. ....                           | 9        |
| Supplementary Table 4. Two-way ANOVA test for O <sub>2</sub> depletion rate as a function of bacteria density. ....                                           | 10       |
| Supplementary Table 5. Two-way ANOVA test for O <sub>2</sub> depletion rate for <i>S. flexneri</i> mutants. ....                                              | 12       |
| Supplementary Table 6. Stools found in the distal colon after infection.....                                                                                  | 13       |
| Supplementary Table 7. Infection foci per mm in the distal colon. ....                                                                                        | 14       |
| Supplementary Table 8. O <sub>2</sub> -dependent modulation of <i>S. flexneri</i> Type III secretion system (T3SS).....                                       | 15       |
| Supplementary Table 9. Cytochrome <i>b</i> and <i>d</i> expression defects in <i>S. flexneri</i> mutants. ....                                                | 16       |
| Supplementary Table 10. ANOVA tests for the growth curves of mutant vs wild-type <i>S. flexneri</i> in the presence or absence of oxygen. ....                | 17       |
| Supplementary Table 11. <i>S. flexneri</i> mutant ability to invade epithelial cells and susceptibility to phagocytosis by neutrophils....                    | 18       |
| Supplementary Table 12. Oxygen depletion in the presence of neutrophils. ....                                                                                 | 20       |

## Supplementary figures.

### Supplementary Figure 1. Single bacteria analysis.

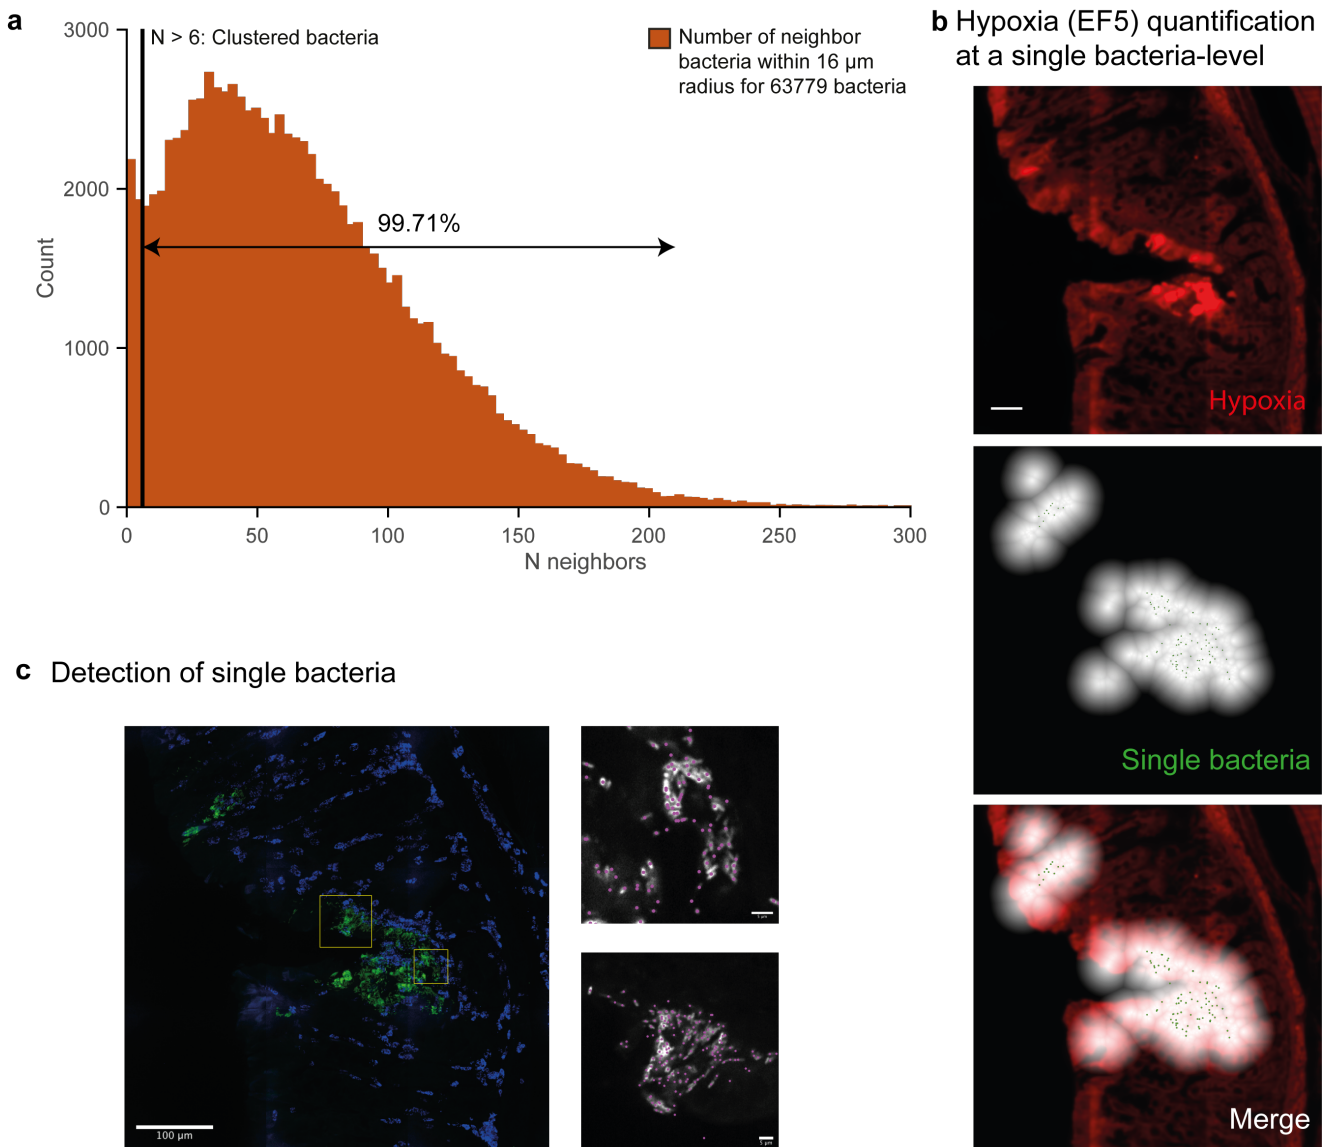

**a.** Histogram of the number of neighbors within 16  $\mu\text{m}$  radius around each *Shigella* bacterium. The estimated size of an infection focus was determined by manual inspection to be roughly of 16  $\mu\text{m}$  in radius. The histogram of the number of bacteria in this neighborhood is bimodal and displays two peaks, one close to  $N = 1$  and one close to  $N = 30$ , with a local minimum at  $N = 6$ . We therefore classified bacteria as 'clustered' if they have more than 6 neighbors within a radius of 16  $\mu\text{m}$ . **b.** EF5 signal in the central Z slice of the dataset used to generate Supplementary Figure 2b. Scale bar: 50  $\mu\text{m}$ . For each pixel of a 3D image, the distance to the closest "clustered" bacteria is calculated thanks to the image distance transform. The distance here is displayed in grayscale from white (0-1  $\mu\text{m}$  to the closest bacterium) to black (distance  $\geq 50 \mu\text{m}$ ). The EF5 pixel intensities are pooled together by their distance to the closest bacterium by bins of 1  $\mu\text{m}$  width (see Methods). We then take the mean and standard deviation for each of these bins and report them as a function of the distance. See Supplementary Figure 2b. Green dots: single bacteria detected in this Z-slice and classified as 'clustered'. Bacteria further away in Z by more than 1  $\mu\text{m}$  or non-clustered are not shown. **c.** The images are acquired at a resolution sufficient to discriminate single bacteria, even when clustered. Left panel: same data as in panel b, maximum intensity projection showing the bacteria (green) and neutrophils (blue) channels. Scale bar: 100  $\mu\text{m}$ . Right: Two insets (yellow box on the left panel) showing a single plane of the same data in the bacteria channels. Scale bars: 5  $\mu\text{m}$ . Purple dots: results of automated bacteria detection, showing only bacteria centered in the current Z plane.

## Supplementary Figure 2. FNR is essential for *S. flexneri* gut colonization and is hyper sensitive to the inflammatory environment *in vivo*.

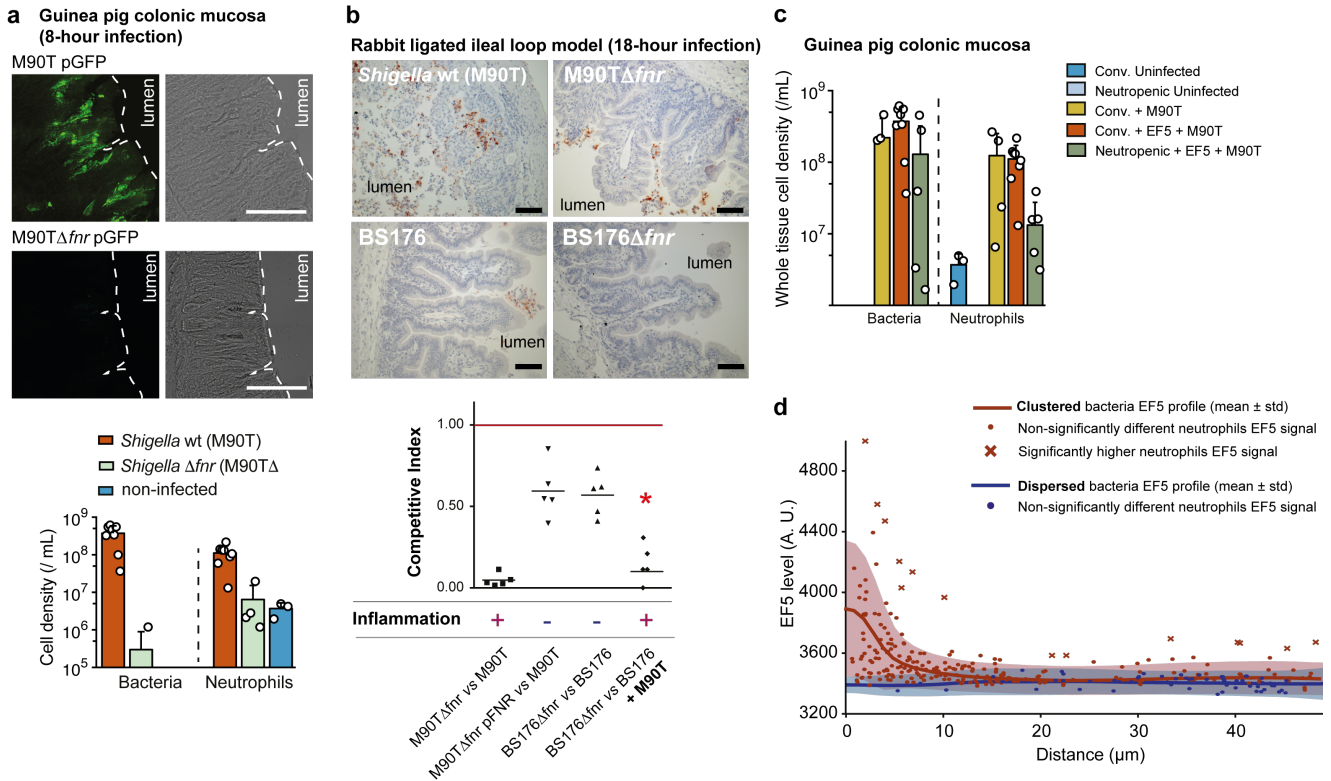

**a. (top)** Example image of colonic tissue during invasion by the *Shigella* M90T pGFP and the  $\Delta fnr$  pGFP mutant strains (left: bacteria, right: transmitted light). No foci of infection were found in 4 animals infected by the latter strain. Scale bar: 50  $\mu\text{m}$ . **(bottom)** Cell density (mean  $\pm$  S.D.) calculated as the number of bacteria or neutrophils divided by the volume of the tissue locus imaged for each animal, expressed in mL. Y-axis uses logarithmic scale. Densities are found to be significantly different between M90T and  $\Delta fnr$  strains for bacteria ( $3.7 \cdot 10^8 \pm 2.1 \cdot 10^8$  /mL, mean  $\pm$  S.D.,  $n = 8$  loci imaged for M90T and  $3.0 \cdot 10^5 \pm 5.9 \cdot 10^5$  /mL for  $\Delta fnr$ ,  $n = 4$  loci imaged,  $p < 7 \cdot 10^{-3}$ , two-sided Student-t test) and neutrophils ( $1.1 \cdot 10^8 \pm 6.1 \cdot 10^4$  /mL,  $n = 8$  for M90T and  $6.4 \cdot 10^6 \pm 8.8 \cdot 10^6$  /mL for  $\Delta fnr$ ,  $n = 4$  loci imaged,  $p < 8 \cdot 10^{-3}$ ). **b. (top)** Histological analysis of the rabbit GI tract infected with *S. flexneri* strains as indicated on each panel. There was marked destruction of the mucosal surface with loss of villi and infiltration of the submucosa with inflammatory cells following challenge with wild-type strain, M90T. These changes are less pronounced after challenge with the  $\Delta fnr$  mutant, BS176, and BS176 $\Delta fnr$ . Scale bars: 50  $\mu\text{m}$ . **(bottom)** Competitive Indexes were calculated during rabbit gut co-infection (ileal loop luminal compartment, 5 loops per condition) with indicated *S. flexneri* strains. Horizontal bars: mean competitive index. M90T is a wild-type strain; BS176 is a plasma cured *S. flexneri* strain (non-invasive). FNR was inactivated in M90T and BS176 strains (M90T $\Delta fnr$  and BS176 $\Delta fnr$  strains, respectively). The inflammatory statuses correspond to the observation of bloody tissue edema. When BS176 and BS176 $\Delta fnr$  were compared, inflammation was induced by co-infection with M90T (last column) (mean  $\pm$  S.D. are calculated from  $n=5$  biologically independent animal samples) (one-sided t-test, \* indicates  $p=0.0003$ ). **c.** Cell densities for neutropenic animals (mean  $\pm$  S.D.). Y-axis uses logarithmic scale. Data for the conventional animals infected by M90T in the presence of EF5 is taken from Supplementary Figure 2a-bottom. The bacteria density is roughly halved in neutropenic animals ( $1.3 \cdot 10^8 \pm 1.9 \cdot 10^8$  /mL,  $n = 6$  imaged loci,  $p \sim 0.05$ , two-sided Student-t test) compared to conventional animals. Infection by *Shigella* M90T triggers recruitment of neutrophils even in neutropenic animals ( $1.3 \cdot 10^7 \pm 1.4 \cdot 10^7$  /mL,  $n = 6$ ), though modestly compared to conventional animals ( $1.1 \cdot 10^8 \pm 6.1 \cdot 10^7$  /mL,  $n = 8$  imaged loci,  $p < 3 \cdot 10^{-3}$ ). **d.** Example plot of 16 replicates of local hypoxia profiles in the vicinity of individual bacteria. The EF5 level was measured in a single image as a function of the distance to the closest bacteria (see Methods and Supplementary Figure 1b), generating one plot for 'clustered' bacteria and one for 'dispersed' bacteria. For 'dispersed' bacteria, the hypoxia profile does not exhibit a peak at the bacteria location. However, for an individual bacterium in an infectious focus, the hypoxia profile peaks at the bacterium location and extends roughly 10  $\mu\text{m}$ . Within the same image, the neutrophils were classified as closer to a 'clustered' bacterium or to a 'dispersed' bacterium, depending on the nearest bacterial neighbor. The EF5 intensity of these neutrophils is

then reported on the proper hypoxia profile along with their distance to the closest bacterium. The local EF5 level of a neutrophil is then compared to the average EF5 profile generated by bacteria at that distance and classified as significantly higher (crosses, significance level at 5%) or not (dots) using a z-test.

### Supplementary Figure 3. Oxygen consumption rate for facultative and tolerant anaerobes.

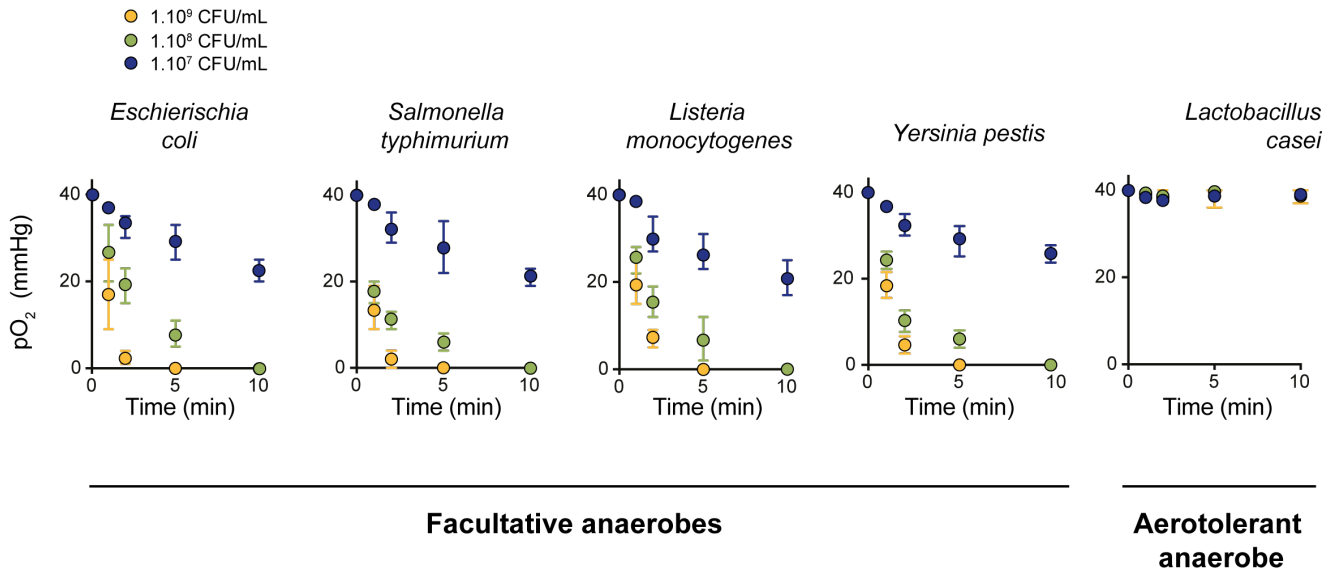

The rate of oxygen consumption was assessed as described in Figure 2e-g with *Escherichia coli*, *Salmonella typhimurium*, *Listeria monocytogenes*, *Yersinia pestis* (facultative anaerobes), and *Lactobacillus casei* (aerotolerant anaerobe) wild-type strains. Oxygen tensions (expressed as mean  $\pm$  S.D.) were assessed at indicated cell densities ( $n = 3$  independent experiments).

## Supplementary Figure 4. Additional characterization of *S. flexneri* $\Delta$ *cydAB* and $\Delta$ *appBC* mutants.

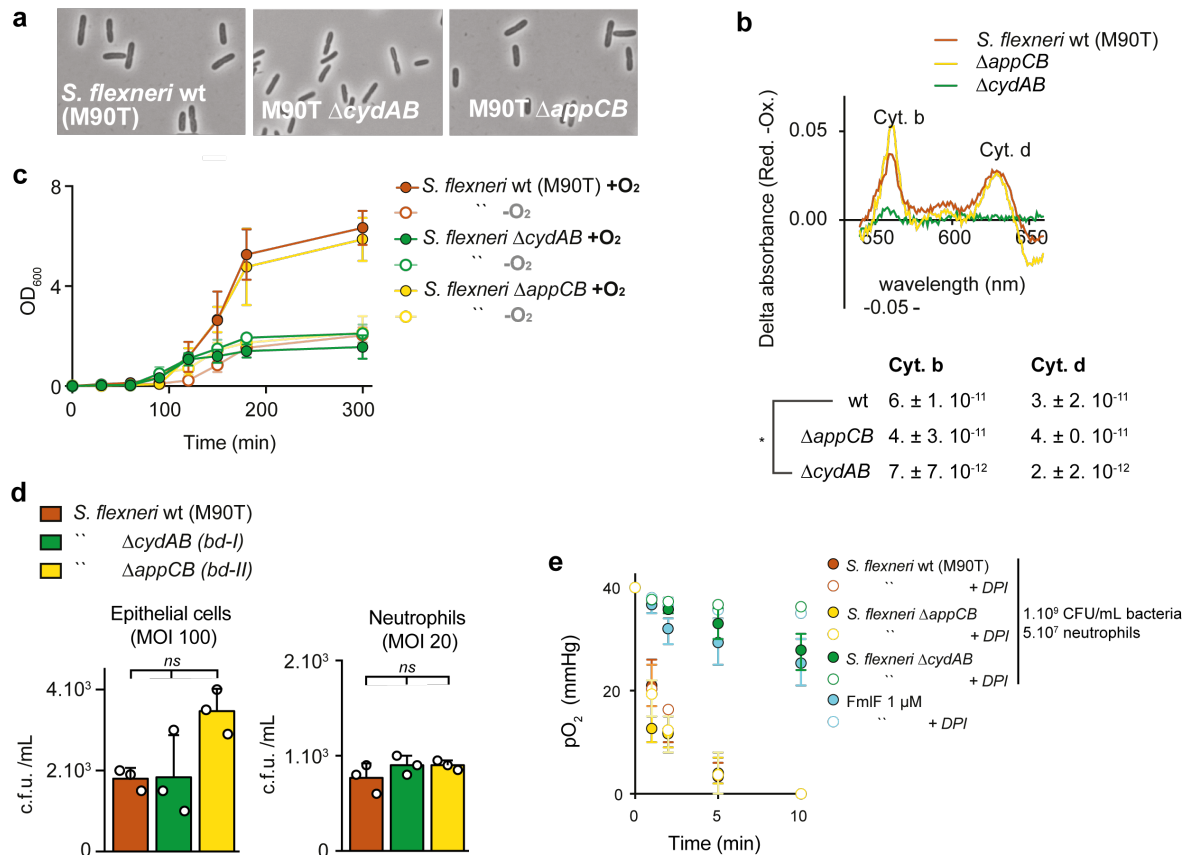

**Supplementary Figure 5. GLUT-1 detection in guinea pig colonic mucosa infected by *S. flexneri* wild-type and mutant strains.**

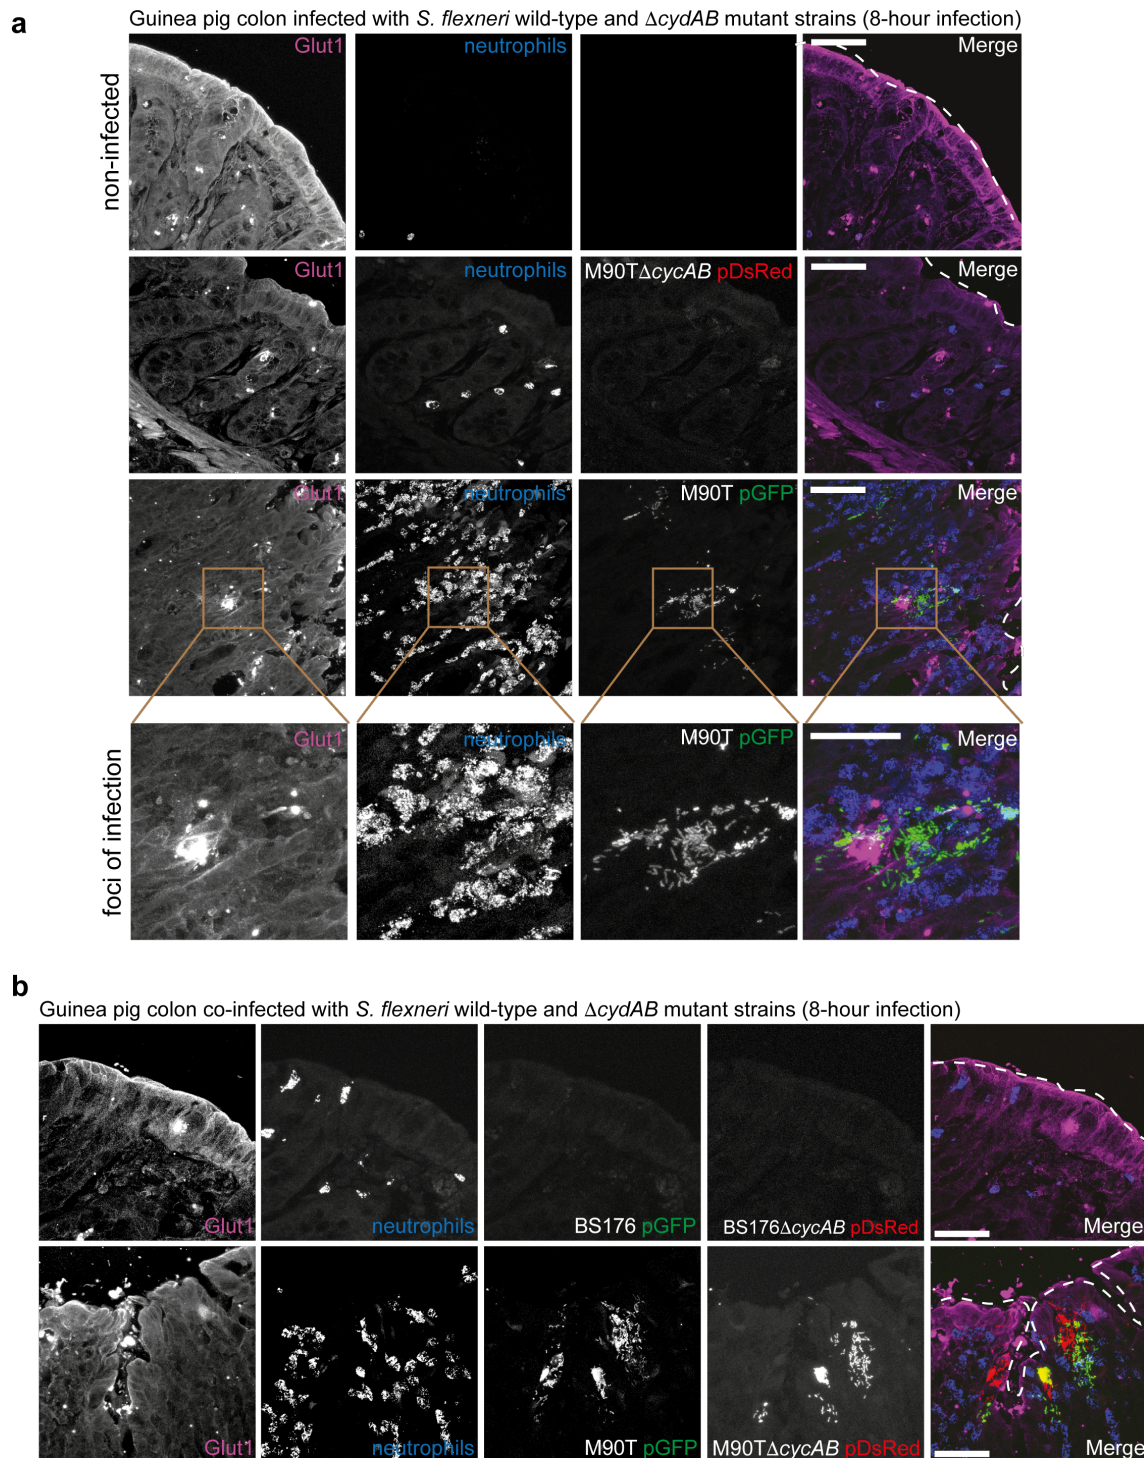

**a.** GLUT-1 was detected with a monoclonal antibody (magenta) in the colonic mucosa of naïve (non-infected) guinea pig or upon infection by *S. flexneri* wild-type strain (M90T pGFP, green), *S. flexneri*  $\Delta$ *cydAB* pDsRed (red) mutant strain. Neutrophils were labeled with the MUB<sub>40</sub>-Dylight405 marker (blue). Scale bar: 150  $\mu$ m. This experiment was repeated independently three times with similar results. **b.** Similar experiments were conducted by co-infecting guinea pigs with plasmid cured BS176 pGFP/BS176 $\Delta$ *cydAB* pDsRed or *S. flexneri* 5a wild-type (M90T pGFP)/M90T $\Delta$ *cydAB* pDsRed (red). As shown in Figure 3f, M90T $\Delta$ *cydAB* pDsRed was able to colonize the colonic mucosa upon co-infection with the wild-type strain. Plasmid-cured BS176 and BS176 $\Delta$ *cydAB* remain in the luminal compartment. GLUT-1 was detected with a monoclonal antibody (magenta). Neutrophils were labeled with the MUB<sub>40</sub>-Dylight405 marker (blue). Scale bar: 70  $\mu$ m.

## Supplementary tables.

Supplementary Table 1. Data generated in this work.

| Condition               | N fields imaged | N animals | N bacteria total | N clustered bacteria total | N dispersed bacteria total | N neutrophils total | Total tissue volume imaged (mm <sup>3</sup> ) |
|-------------------------|-----------------|-----------|------------------|----------------------------|----------------------------|---------------------|-----------------------------------------------|
| FNR + EF5               | 8               | 4         | 6                | 0                          | 1                          | 162                 | 22.2 10 <sup>-3</sup>                         |
| M90T                    | 8               | 4         | 11753            | 11400                      | 28                         | 5883                | 41.8 10 <sup>-3</sup>                         |
| M90T + EF5              | 37              | 9         | 63779            | 61119                      | 186                        | 19665               | 163.1 10 <sup>-1</sup>                        |
| M90T + EF5, Neutropenic | 17              | 6         | 11372            | 6771                       | 30                         | 3289                | 58.2 10 <sup>-3</sup>                         |
| UI + EF5                | 6               | 3         | 0                | 0                          | 0                          | 66                  | 18.2 10 <sup>-3</sup>                         |
| UI + EF5, Neutropenic   | 5               | 3         | 0                | 0                          | 0                          | 7                   | 15.1 10 <sup>-3</sup>                         |
| Total                   | 81              | 29        | 86910            | 79290                      | 245                        | 29072               | 318.5 10 <sup>-3</sup>                        |

- FNR: *S. flexneri*  $\Delta$ fnr strain
- EF5: animals injected with EF5 prior challenge.
- M90T: *S. flexneri* 5a pGFP strain.
- Neutropenic: experiments done with neutropenic animals.
- UI: uninfected animals.

**Supplementary Table 2. ANOVA test for hypoxia levels around dispersed or clustered bacteria.**

Data displayed in [Figure 1f](#).  
EF5 levels.

| Condition       | Mean (A.U.) | Std (A.U.) | N bacteria |
|-----------------|-------------|------------|------------|
| Clustered + EF5 | 3617        | 342        | 61119      |
| Dispersed + EF5 | 3391        | 134        | 186        |
| No EF5          | 3344        | 79         | 11400      |

ANOVA-1 table.

| Source | Sum of squares   | Degrees of freedom | Mean squares     | F    | Prob > F |
|--------|------------------|--------------------|------------------|------|----------|
| Groups | $7.2 \cdot 10^8$ | 2                  | $3.6 \cdot 10^8$ | 3636 | 0        |
| Error  | $7.2 \cdot 10^9$ | 72702              | $9.9 \cdot 10^4$ |      |          |
| Total  | $7.9 \cdot 10^9$ | 72704              |                  |      |          |

*Post Hoc* Tukey-test.

| Condition 1     | Condition 2     | Lower conf. interval (95%, A.U.) | Diff. of means (A.U.) | Upper conf. interval (95%, A.U.) | p-value |
|-----------------|-----------------|----------------------------------|-----------------------|----------------------------------|---------|
| No EF5          | Clustered + EF5 | -280.7                           | -273.2                | -265.6                           | 0       |
| No EF5          | Dispersed + EF5 | -101.8                           | -47.2                 | 7.4                              | 0.1063  |
| Clustered + EF5 | Dispersed + EF5 | 171.7                            | 226.0                 | 280.2                            | 0       |



### Supplementary Table 3. Student-*t* test comparing hypoxia levels around bacteria in conventional vs neutropenic animals.

Data displayed in [Figure 2b](#).

EF5 levels. Two-sided Student *t*-test comparing bacteria in conventional and neutropenic animals.

| Condition          |                      | Mean (A.U.) | Std (A.U.) | N bacteria | <i>p</i> -values |
|--------------------|----------------------|-------------|------------|------------|------------------|
| Clustered bacteria | Conventional animals | 3617        | 342        | 61119      | < 0.0001         |
|                    | Neutropenic animals  | 3506        | 126        | 6771       |                  |
| Dispersed bacteria | Conventional animals | 3391        | 134        | 186        | > 0.37           |
|                    | Neutropenic animals  | 3415        | 159        | 30         |                  |

### Supplementary Table 4. Two-way ANOVA test for O<sub>2</sub> depletion rate as a function of bacteria density.

Data displayed in [Figure 2g](#).

#### Left plot: O<sub>2</sub> depletion rate with a bacteria concentration of 5 10<sup>9</sup> / mL.

Two-way ANOVA table on *Condition* and *Time*. pO<sub>2</sub> in mmHg. *n*=3 independent experiments.

| Source    | Sum of squares      | Degrees of freedom | Mean squares        | F    | Prob > F            |
|-----------|---------------------|--------------------|---------------------|------|---------------------|
| Time      | 5.0 10 <sup>3</sup> | 4                  | 1.3 10 <sup>3</sup> | 20.4 | < 10 <sup>-8</sup>  |
| Condition | 8.8 10 <sup>3</sup> | 2                  | 4.4 10 <sup>3</sup> | 74.5 | < 10 <sup>-12</sup> |
| Error     | 2.3 10 <sup>3</sup> | 38                 | 61.3                |      |                     |
| Total     | 1.6 10 <sup>4</sup> | 44                 |                     |      |                     |

Condition: *S. flexneri*; *S. flexneri* + PMN; Naïve PMN.

Time: 0 min; 1 min; 2 min; 5 min; 10 min.

Post Hoc Tukey-test along *Condition* dimension:

| Condition 1              | Condition 2        | Lower conf. interval (95%, mmHg) | Diff. of means (mmHg) | Upper conf. interval (95%, mmHg) | <i>p</i> -value |
|--------------------------|--------------------|----------------------------------|-----------------------|----------------------------------|-----------------|
| <i>S. flexneri</i>       | Naïve PMN          | 22.6                             | 29.6                  | 36.6                             | 0               |
| <i>S. flexneri</i> + PMN | Naïve PMN          | 22.6                             | 29.6                  | 36.6                             | 0               |
| <i>S. flexneri</i> + PMN | <i>S. flexneri</i> | -7.0                             | 0                     | 7.0                              | 1               |

#### Middle plot: O<sub>2</sub> depletion rate with a bacteria concentration of 1 10<sup>6</sup> / mL.

Two-way ANOVA table on *Condition* and *Time*. pO<sub>2</sub> in mmHg. *n*=3 independent experiments.

| Source    | Sum of squares | Degrees of freedom | Mean squares | F    | Prob > F |
|-----------|----------------|--------------------|--------------|------|----------|
| Time      | 421            | 4                  | 105          | 24.7 | 0        |
| Condition | 43.2           | 1                  | 43.2         | 10.1 | < 0.01   |
| Error     | 102            | 24                 | 4.27         |      |          |
| Total     | 567            | 29                 |              |      |          |

Condition: *S. flexneri*; *S. flexneri* + PMN.

Time: 0 min; 1 min; 2 min; 5 min; 10 min.

Post Hoc Tukey-test: For each comparison *S. flexneri* vs *S. flexneri* + PMN at equal time, we find *p* ~ 0.09.

**Right plot: O<sub>2</sub> depletion rate with a heat-killed bacteria concentration of 5 10<sup>9</sup> / mL.**

Two-way ANOVA table on *Condition* and *Time*. pO<sub>2</sub> in mmHg. *n*=3 independent experiments.

| Source    | Sum of squares | Degrees of freedom | Mean squares | F    | Prob > F |
|-----------|----------------|--------------------|--------------|------|----------|
| Time      | 414            | 4                  | 35.3         | 11.3 | 0        |
| Condition | 19.2           | 1                  | 19.2         | 6.13 | 0.02     |
| Error     | 75.1           | 24                 | 3.13         |      |          |
| Total     | 235.5          | 29                 |              |      |          |

Condition: *S. flexneri* heat-killed; *S. flexneri* heat-killed + PMN.

Time: 0 min; 1 min; 2 min; 5 min; 10 min.

*Post Hoc* Tukey-test: For each comparison *S. flexneri* heat-killed vs *S. flexneri* heat-killed + PMN at equal *time*, we find  $p \sim 0.33$ .

**Supplementary Table 5. Two-way ANOVA test for O<sub>2</sub> depletion rate for *S. flexneri* mutants.**

Data displayed in [Figure 3b](#).

Two-way ANOVA table, on *Condition* and *time*. pO<sub>2</sub> in mmHg. 3 independent experiments.

| Source    | Sum of squares | Degrees of freedom | Mean squares | F    | Prob > F           |
|-----------|----------------|--------------------|--------------|------|--------------------|
| Time      | 4199           | 4                  | 1049         | 20.5 | < 10 <sup>-8</sup> |
| Condition | 4402           | 2                  | 2201         | 43.1 | < 10 <sup>-9</sup> |
| Error     | 1942           | 38                 | 51.1         |      |                    |
| Total     | 10589          | 44                 |              |      |                    |

Condition: *S. flexneri* WT;  $\Delta appCB$ ;  $\Delta cydAB$ .

Time: 0 min; 1 min; 2 min; 5 min; 10 min.

Post Hoc Tukey-test along *Condition* dimension:

| Condition 1                      | Condition 2                      | Lower conf. interval (95%, mmHg) | Diff. of means (mmHg) | Upper conf. interval (95%, mmHg) | p-value |
|----------------------------------|----------------------------------|----------------------------------|-----------------------|----------------------------------|---------|
| <b><math>\Delta appCB</math></b> | <b><math>\Delta cydAB</math></b> | -25.8                            | -19.4                 | -13.0                            | 0       |
| $\Delta appCB$                   | <i>S. flexneri</i> WT            | -3.50                            | 2.87                  | 9.23                             | 0.52    |
| <b><math>\Delta cydAB</math></b> | <i>S. flexneri</i> WT            | 15.9                             | 22.3                  | 28.6                             | 0       |

### Supplementary Table 6. Stools found in the distal colon after infection.

Data displayed in [Figure 3d](#).

Varying infection agent. Conditions: *non-infected*, *infected by M90T*, *infected by mutant  $\Delta$ cydAB*, *infected by mutant  $\Delta$ appCB*.

Number of stools in the distal colon:

| Condition      | Mean | Std | N animals |
|----------------|------|-----|-----------|
| M90T           | 0.0  | 0.0 | 5         |
| Non-infected   | 8.0  | 0.7 | 5         |
| $\Delta$ appCB | 0.0  | 0.0 | 5         |
| $\Delta$ cydAB | 7.8  | 0.4 | 5         |

One-way ANOVA table.

| Source | Sum of squares | Degrees of freedom | Mean squares | F     | Prob > F     |
|--------|----------------|--------------------|--------------|-------|--------------|
| Groups | 321            | 3                  | 104          | 594.6 | $< 10^{-15}$ |
| Error  | 2.8            | 16                 | 0.18         |       |              |
| Total  | 315            | 19                 |              |       |              |

Post Hoc Tukey-test.

| Condition 1    | Condition 2    | Lower conf. interval (95%) | Diff. of means | Upper conf. interval (95%) | p-value     |
|----------------|----------------|----------------------------|----------------|----------------------------|-------------|
| M90T           | Non-infected   | -8.8                       | -8             | -7.2                       | $< 10^{-8}$ |
| M90T           | $\Delta$ appCB | -0.8                       | 0              | 0.8                        | 1           |
| M90T           | $\Delta$ cydAB | -8.6                       | -7.8           | -7.0                       | $< 10^{-8}$ |
| Non-infected   | $\Delta$ appCB | 7.2                        | 8              | 8.6                        | $< 10^{-8}$ |
| Non-infected   | $\Delta$ cydAB | -0.6                       | 0.2            | 1.0                        | 0.87        |
| $\Delta$ appCB | $\Delta$ cydAB | -8.6                       | -7.8           | -7.0                       | $< 10^{-8}$ |

### Supplementary Table 7. Infection foci per mm in the distal colon.

Data displayed in [Figure 3e](#).

Varying infection agent. Conditions: *non-infected*, *infected by M90T*, *infected by mutant  $\Delta$ cydAB*, *infected by mutant  $\Delta$ appCB*.

Number of foci / mm in the distal colon:

| Condition      | Mean | Std | N animals |
|----------------|------|-----|-----------|
| M90T           | 17.0 | 5.1 | 5         |
| Non-infected   | 0.0  | 0.0 | 5         |
| $\Delta$ appCB | 22.6 | 5.3 | 5         |
| $\Delta$ cydAB | 2.2  | 2.0 | 5         |

One-way ANOVA table.

| Source | Sum of squares | Degrees of freedom | Mean squares | F    | Prob > F           |
|--------|----------------|--------------------|--------------|------|--------------------|
| Groups | 1839           | 3                  | 613          | 41.6 | < 10 <sup>-7</sup> |
| Error  | 236            | 16                 | 14.8         |      |                    |
| Total  | 2075           | 19                 |              |      |                    |

*Post Hoc* Tukey-test.

| Condition 1    | Condition 2    | Lower conf. interval (95%) | Diff. of means | Upper conf. interval (95%) | p-value            |
|----------------|----------------|----------------------------|----------------|----------------------------|--------------------|
| M90T           | Non-infected   | 10.0                       | 17.0           | 23.9                       | < 10 <sup>-4</sup> |
| M90T           | $\Delta$ appCB | -12.5                      | -5.6           | 1.35                       | 0.14               |
| M90T           | $\Delta$ cydAB | 7.9                        | 14.8           | 21.7                       | < 10 <sup>-4</sup> |
| Non-infected   | $\Delta$ appCB | -29.5                      | -22.6          | -15.7                      | < 10 <sup>-6</sup> |
| Non-infected   | $\Delta$ cydAB | -9.15                      | -2.20          | 4.75                       | 0.80               |
| $\Delta$ appCB | $\Delta$ cydAB | 13.5                       | 20.4           | 27.34                      | < 10 <sup>-5</sup> |

### Supplementary Table 8. O<sub>2</sub>-dependent modulation of *S. flexneri* Type III secretion system (T3SS).

Data displayed in [Figure 4b](#).

Conditions: with or without O<sub>2</sub> (+/-O<sub>2</sub>), with or without Congo-Red (+/-CR).

M90T pTSAR - GFP intensity (A.U.)

| Condition           | Mean (A.U.) | Std (A.U.) | N   |
|---------------------|-------------|------------|-----|
| -O <sub>2</sub> -CR | 561.8       | 81.7       | 103 |
| -O <sub>2</sub> +CR | 579.1       | 91.0       | 110 |
| +O <sub>2</sub> -CR | 579.8       | 120.5      | 104 |
| +O <sub>2</sub> +CR | 1305.7      | 264.5      | 103 |

One-way ANOVA table.

| Source | Sum of squares      | Degrees of freedom | Mean squares        | F     | Prob > F |
|--------|---------------------|--------------------|---------------------|-------|----------|
| Groups | 4.1 10 <sup>7</sup> | 3                  | 1.4 10 <sup>7</sup> | 567.2 | 0        |
| Error  | 1.0 10 <sup>7</sup> | 416                | 2.4 10 <sup>4</sup> |       |          |
| Total  | 5.1 10 <sup>7</sup> | 419                |                     |       |          |

*Post Hoc* Tukey-test.

| Condition 1         | Condition 2               | Lower conf. interval (95%, A.U.) | Diff. of means (A.U.) | Upper conf. interval (95%, A.U.) | p-value |
|---------------------|---------------------------|----------------------------------|-----------------------|----------------------------------|---------|
| -O <sub>2</sub> -CR | -O <sub>2</sub> +CR       | -65.2                            | -10.5                 | 44.2                             | > 0.9   |
| -O <sub>2</sub> -CR | +O <sub>2</sub> -CR       | -77.0                            | -21.6                 | 33.9                             | > 0.7   |
| -O <sub>2</sub> +CR | +O <sub>2</sub> -CR       | -65.6                            | -11.1                 | 43.5                             | > 0.9   |
| -O <sub>2</sub> -CR | <b>+O<sub>2</sub> +CR</b> | -792.7                           | -737.1                | -681.5                           | 0       |
| -O <sub>2</sub> +CR | <b>+O<sub>2</sub> +CR</b> | -781.3                           | -726.6                | -671.9                           | 0       |
| +O <sub>2</sub> -CR | <b>+O<sub>2</sub> +CR</b> | -771.0                           | -715.5                | -660.1                           | 0       |

## Supplementary Table 9. Cytochrome *b* and *d* expression defects in *S. flexneri* mutants.

Data displayed in Supplementary Figure 4b. mol/OD600.

### Cytochrome *b*.

One-way ANOVA table. 3 independent experiments.

| Source | Sum of squares       | Degrees of freedom | Mean squares         | F   | Prob > F |
|--------|----------------------|--------------------|----------------------|-----|----------|
| Groups | $3.4 \cdot 10^{-21}$ | 2                  | $1.7 \cdot 10^{-21}$ | 6.2 | 0.035    |
| Error  | $1.6 \cdot 10^{-21}$ | 6                  | $2.7 \cdot 10^{-22}$ |     |          |
| Total  | $5.0 \cdot 10^{-21}$ | 8                  |                      |     |          |

Post Hoc Tukey-test.

| Condition 1    | Condition 2    | Lower conf. interval (95%, A.U.) | Diff. of means (A.U.) | Upper conf. interval (95%, A.U.) | <i>p</i> -value |
|----------------|----------------|----------------------------------|-----------------------|----------------------------------|-----------------|
| $\Delta appCB$ | $\Delta cydAB$ | $-0.6 \cdot 10^{-11}$            | $3.5 \cdot 10^{-11}$  | $7.7 \cdot 10^{-11}$             | 0.088           |
| $\Delta appCB$ | WT             | $-5.1 \cdot 10^{-11}$            | $-1.0 \cdot 10^{-11}$ | $3.2 \cdot 10^{-11}$             | 0.762           |
| $\Delta cydAB$ | WT             | $-8.6 \cdot 10^{-11}$            | $-4.5 \cdot 10^{-11}$ | $-0.4 \cdot 10^{-11}$            | 0.036           |

### Cytochrome *d*.

One-way ANOVA table. 3 independent experiments.

| Source | Sum of squares       | Degrees of freedom | Mean squares         | F   | Prob > F |
|--------|----------------------|--------------------|----------------------|-----|----------|
| Groups | $2.6 \cdot 10^{-21}$ | 2                  | $1.3 \cdot 10^{-21}$ | 7.2 | 0.026    |
| Error  | $1.1 \cdot 10^{-21}$ | 6                  | $1.8 \cdot 10^{-22}$ |     |          |
| Total  | $3.7 \cdot 10^{-21}$ | 8                  |                      |     |          |

Post Hoc Tukey-test.

| Condition 1    | Condition 2    | Lower conf. interval (95%, A.U.) | Diff. of means (A.U.) | Upper conf. interval (95%, A.U.) | <i>p</i> -value |
|----------------|----------------|----------------------------------|-----------------------|----------------------------------|-----------------|
| $\Delta appCB$ | $\Delta cydAB$ | $0.7 \cdot 10^{-11}$             | $4.1 \cdot 10^{-11}$  | $7.5 \cdot 10^{-11}$             | 0.023           |
| $\Delta appCB$ | WT             | $-1.9 \cdot 10^{-11}$            | $1.5 \cdot 10^{-11}$  | $4.8 \cdot 10^{-11}$             | 0.430           |
| $\Delta cydAB$ | WT             | $-6.0 \cdot 10^{-11}$            | $-2.6 \cdot 10^{-11}$ | $0.8 \cdot 10^{-11}$             | 0.112           |



### Supplementary Table 10. ANOVA tests for the growth curves of mutant vs wild-type *S.flexneri* in the presence or absence of oxygen.

Data displayed in Supplementary Figure 4c.  
Optical density, 3 independent experiments.  
One-way ANOVA table.

|             | Source        | Sum of squares | Degrees of freedom | Mean squares | F    | Prob > F             |
|-------------|---------------|----------------|--------------------|--------------|------|----------------------|
| T = 180 min | <b>Groups</b> | 46.2           | 5                  | 9.2          | 15.3 | 7.7 10 <sup>-5</sup> |
|             | <b>Error</b>  | 7.3            | 12                 | 0.6          |      |                      |
|             | <b>Total</b>  | 53.5           | 17                 |              |      |                      |
| T = 300 min | <b>Groups</b> | 70.0           | 5                  | 13.9         | 39.7 | 4.7 10 <sup>-7</sup> |
|             | <b>Error</b>  | 4.2            | 12                 | 0.4          |      |                      |
|             | <b>Total</b>  | 73.8           | 17                 |              |      |                      |

Post Hoc Tukey-test:

Here we provide the comparisons by groups of conditions:

- group A: *S.flexneri* WT+O<sub>2</sub>; *S.flexneri* Δ*appCB*+O<sub>2</sub>.
- group B: *S.flexneri* WT-O<sub>2</sub>; *S.flexneri* Δ*appCB*-O<sub>2</sub>; *S.flexneri* Δ*cydAB*-O<sub>2</sub>; ***S.flexneri* Δ*cydAB*+O<sub>2</sub>**.

Pairwise comparisons with Tukey test for any member of one group against any member of the other group:

|                    | 180 min        | 300 min        |
|--------------------|----------------|----------------|
| <b>Comparison</b>  | <b>p-value</b> | <b>p-value</b> |
| Within group A     | > 0.9          | > 0.9          |
| Within group B     | > 0.9          | > 0.8          |
| Group A vs group B | < 0.01         | < 0.001        |

### Supplementary Table 11. *S.flexneri* mutant ability to invade epithelial cells and susceptibility to phagocytosis by neutrophils.

Data displayed in Supplementary Figure 4d.

Conditions: M90T (*S.flexneri* W.T.), mutant  $\Delta$ cydAB, mutant  $\Delta$ appCB.

#### Left plot: Ability to invade epithelial cells.

c.f.u. / mL, Hep2, MOI 100.

| Condition      | Mean (c.f.u. /mL) | Std (c.f.u. / mL) | N |
|----------------|-------------------|-------------------|---|
| M90T           | 1800              | 55                | 3 |
| $\Delta$ cydAB | 3467              | 1041              | 3 |
| $\Delta$ appCB | 1833              | 245               | 3 |

One-way ANOVA table.

| Source | Sum of squares      | Degrees of freedom | Mean squares        | F    | Prob > F |
|--------|---------------------|--------------------|---------------------|------|----------|
| Groups | 5.4 10 <sup>6</sup> | 2                  | 2.7 10 <sup>6</sup> | 5.61 | 0.042    |
| Error  | 2.9 10 <sup>6</sup> | 6                  | 4.9 10 <sup>5</sup> |      |          |
| Total  | 8.4 10 <sup>6</sup> | 8                  |                     |      |          |

Post Hoc Tukey-test.

| Condition 1    | Condition 2    | Lower conf. interval (95%) | Diff. of means | Upper conf. interval (95%) | p-value |
|----------------|----------------|----------------------------|----------------|----------------------------|---------|
| $\Delta$ appCB | $\Delta$ cydAB | -3379                      | -1633          | 112                        | 0.064   |
| $\Delta$ appCB | M90T           | -1712                      | 33             | 1779                       | 1       |
| $\Delta$ cydAB | M90T           | -79                        | 1667           | 3412                       | 0.059   |

#### Right plot: Susceptibility to neutrophil phagocytosis.

c.f.u. / mL, MOI 20.

| Condition      | Mean (c.f.u. /mL) | Std (c.f.u. / mL) | N |
|----------------|-------------------|-------------------|---|
| M90T           | 767               | 153               | 3 |
| $\Delta$ cydAB | 900               | 100               | 3 |
| $\Delta$ appCB | 900               | 50                | 3 |

One-way ANOVA table.

| Source | Sum of squares   | Degrees of freedom | Mean squares     | F    | Prob > F |
|--------|------------------|--------------------|------------------|------|----------|
| Groups | $3.6 \cdot 10^5$ | 2                  | $1.7 \cdot 10^5$ | 1.49 | 0.30     |
| Error  | $7.2 \cdot 10^5$ | 6                  | $1.2 \cdot 10^5$ |      |          |
| Total  | $1.1 \cdot 10^6$ | 8                  |                  |      |          |

*Post Hoc* Tukey-test.

| Condition 1   | Condition 2   | Lower conf. interval (95%) | Diff. of means | Upper conf. interval (95%) | <i>p</i> -value |
|---------------|---------------|----------------------------|----------------|----------------------------|-----------------|
| <i>ΔappCB</i> | <i>ΔcydAB</i> | -274                       | 0              | 273                        | 1               |
| <i>ΔappCB</i> | M90T          | -140                       | 133            | 407                        | 0.36            |
| <i>ΔcydAB</i> | M90T          | -140                       | 133            | 407                        | 0.36            |

## Supplementary Table 12. Oxygen depletion in the presence of neutrophils.

Data displayed in Supplementary Figure 4e.

Two-way ANOVA table, on *Condition* and *time*. pO<sub>2</sub> in mmHg. 3 independent experiments.

| Source    | Sum of squares | Degrees of freedom | Mean squares | F    | Prob > F              |
|-----------|----------------|--------------------|--------------|------|-----------------------|
| Time      | 8627.0         | 4                  | 2156.7       | 51.0 | 4.7 10 <sup>-24</sup> |
| Condition | 13077          | 7                  | 1868.2       | 44.2 | 6.7 10 <sup>-29</sup> |
| Error     | 4565.4         | 108                | 42.3         |      |                       |
| Total     | 2629.6         | 119                |              |      |                       |

Condition: We split them in two groups to simplify pairwise comparison results display.

| Group A                                 | Group B                                 |
|-----------------------------------------|-----------------------------------------|
| <i>FmIF</i> (1 mM)                      | <i>S. flexneri</i> WT                   |
| <i>FmIF</i> (1 mM) + DPI                | <i>S. flexneri</i> WT + DPI             |
| <i>S. flexneri</i> Δ <i>cydAB</i>       | <i>S. flexneri</i> Δ <i>appCB</i>       |
| <i>S. flexneri</i> Δ <i>cydAB</i> + DPI | <i>S. flexneri</i> Δ <i>addCB</i> + DPI |

Time: 0 min; 1 min; 2 min; 5 min; 10 min.

Post Hoc Tukey-test along Condition dimension:

| Condition 1    | Condition 2    | p-value            |
|----------------|----------------|--------------------|
| Any in Group A | Any in Group B | < 10 <sup>-7</sup> |
| Any in Group A | Any in Group A | > 0.3              |
| Any in Group B | Any in Group B | > 0.9              |
